# Supplementary material for: The First Berberine-Based Inhibitors of Tyrosyl-DNA Phosphodiesterase 1 (Tdp1), an Important DNA Repair Enzyme
Source: PubMed Central journal article supplement (PMC7582571; doi:10.3390/ijms21197162), 2020-09-28
Supplement: ijms-21-07162-s001.pdf [file ijms-21-07162-s001.pdf]

## SUPPLEMENTARY MATERIALS

### **The first berberine-based inhibitors of tyrosyl-DNA phosphodiesterase 1 (Tdp1), an important DNA repair enzyme**

Elizaveta D. Gladkova, Ivan V. Nechepurenko, Roman A. Bredikhin, Arina A. Chepanova, Alexandra L. Zakharenko, Olga A. Luzina, Ekaterina S. Ilina, Nadezhda S. Dyrkheeva, Evgeniya M. Mamontova, Rashid O. Anarbaev, Jóhannes Reynisson, Konstantin P. Volcho, Nariman F. Salakhutdinov and Olga I. Lavrik

NMR  $^1\text{H}$  and  $^{13}\text{C}$  spectra of the compounds **10a - 10d** (solvent – DMSO- $d_6$ ).

**Table S1.** The binding scores for the scoring functions used.

**Table S2.** The molecular descriptors and their corresponding Known Drug Indexes 2a and 2b (KDI2a/2b).

**Table S3.** Definition of lead-like, drug-like and Known drug space (KDS) in terms of molecular descriptors. The values given are the maxima for each descriptor for the volumes of chemical space used.

### Compound 10a (<sup>1</sup>H NMR)

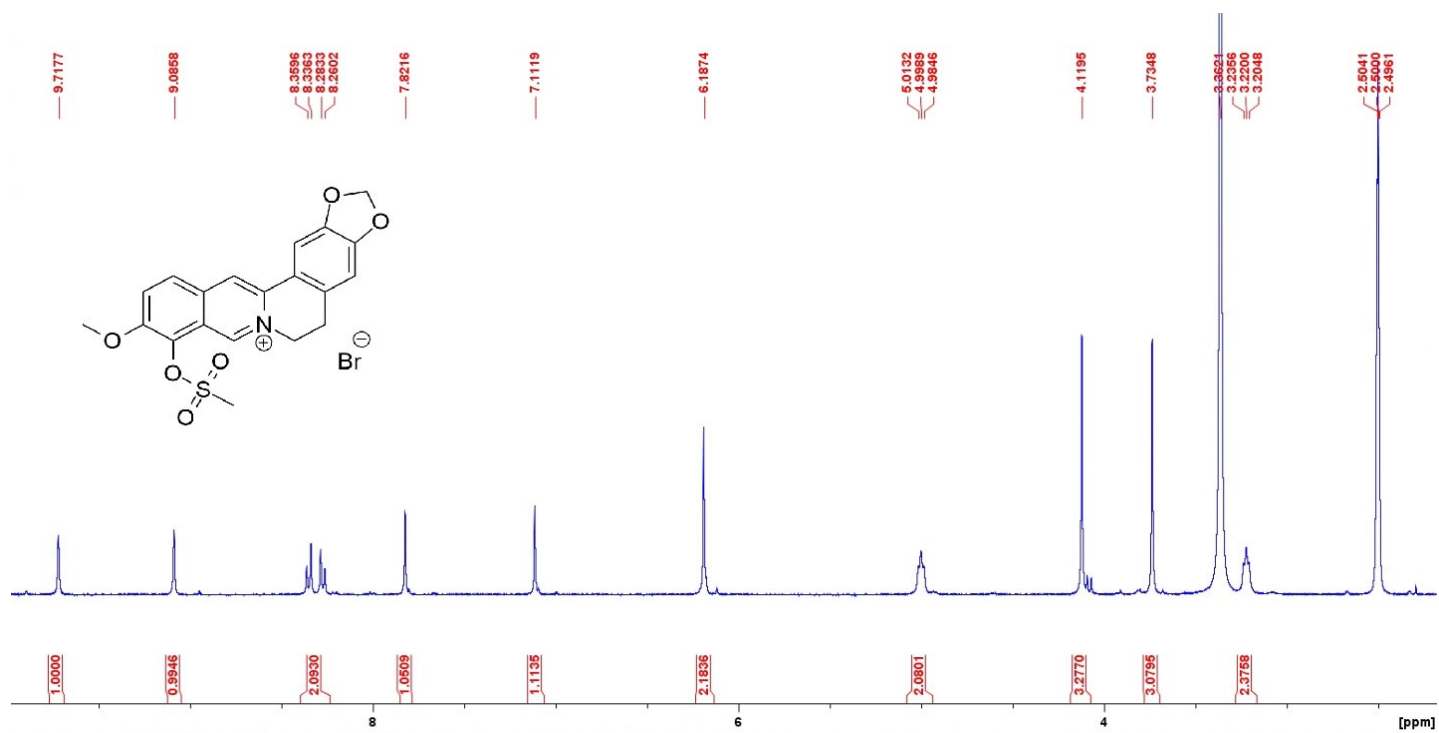

### Compound 10a (<sup>13</sup>C NMR)

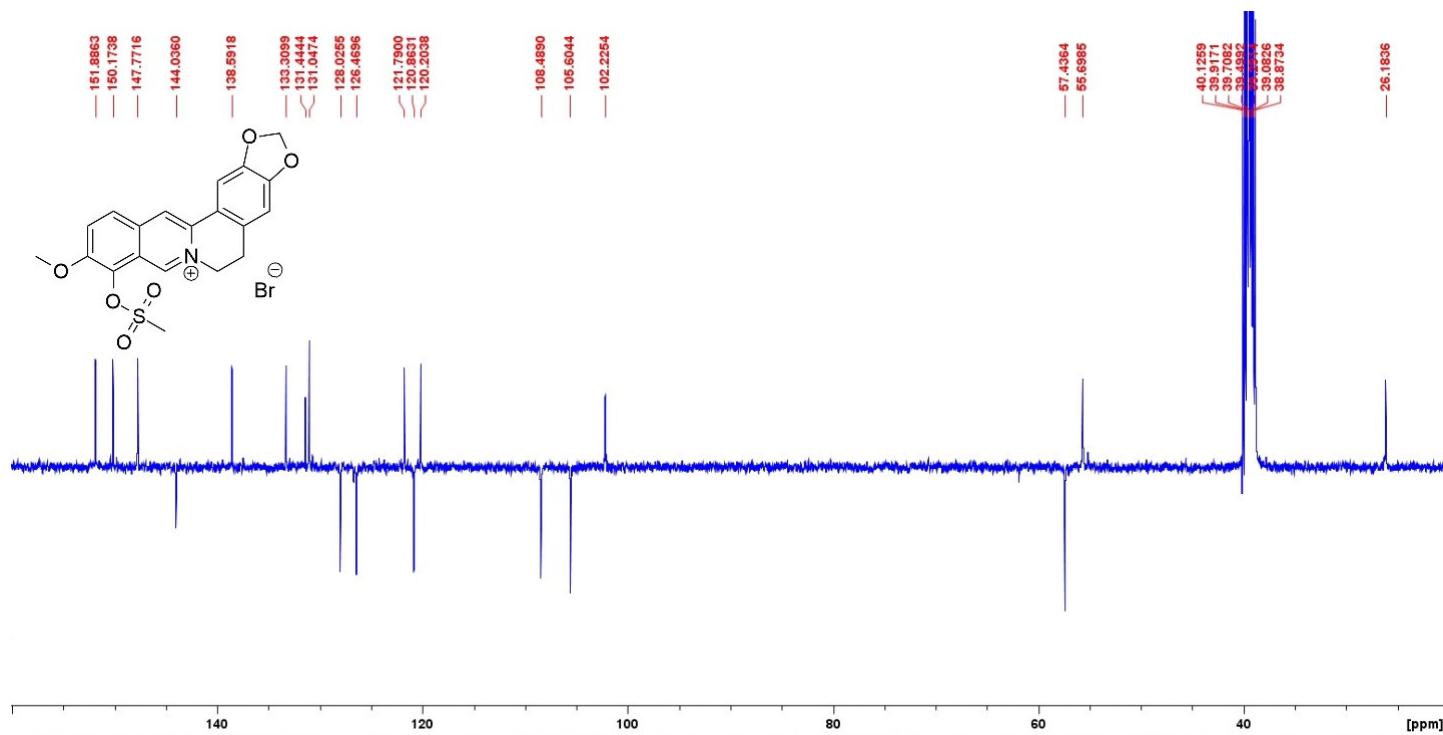

### Compound 10b (<sup>1</sup>H NMR)

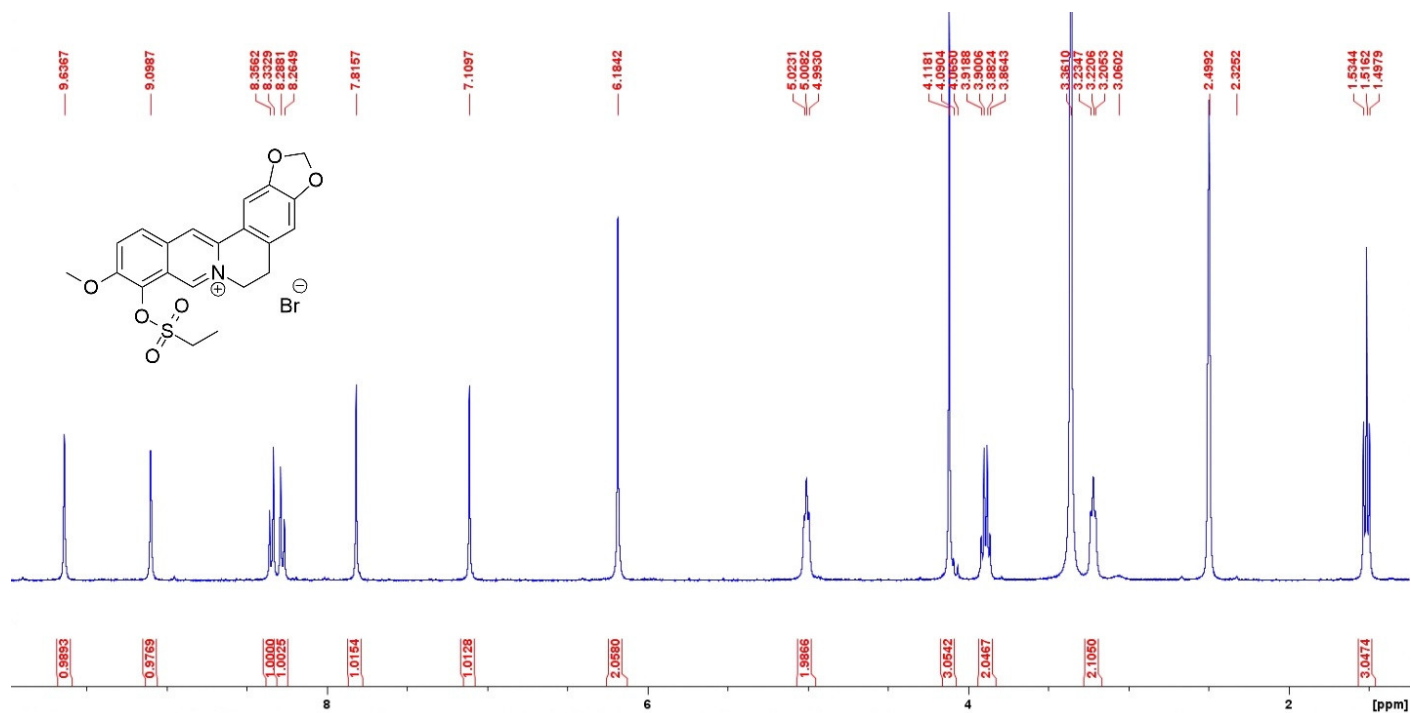

### Compound 10b (<sup>13</sup>C NMR)

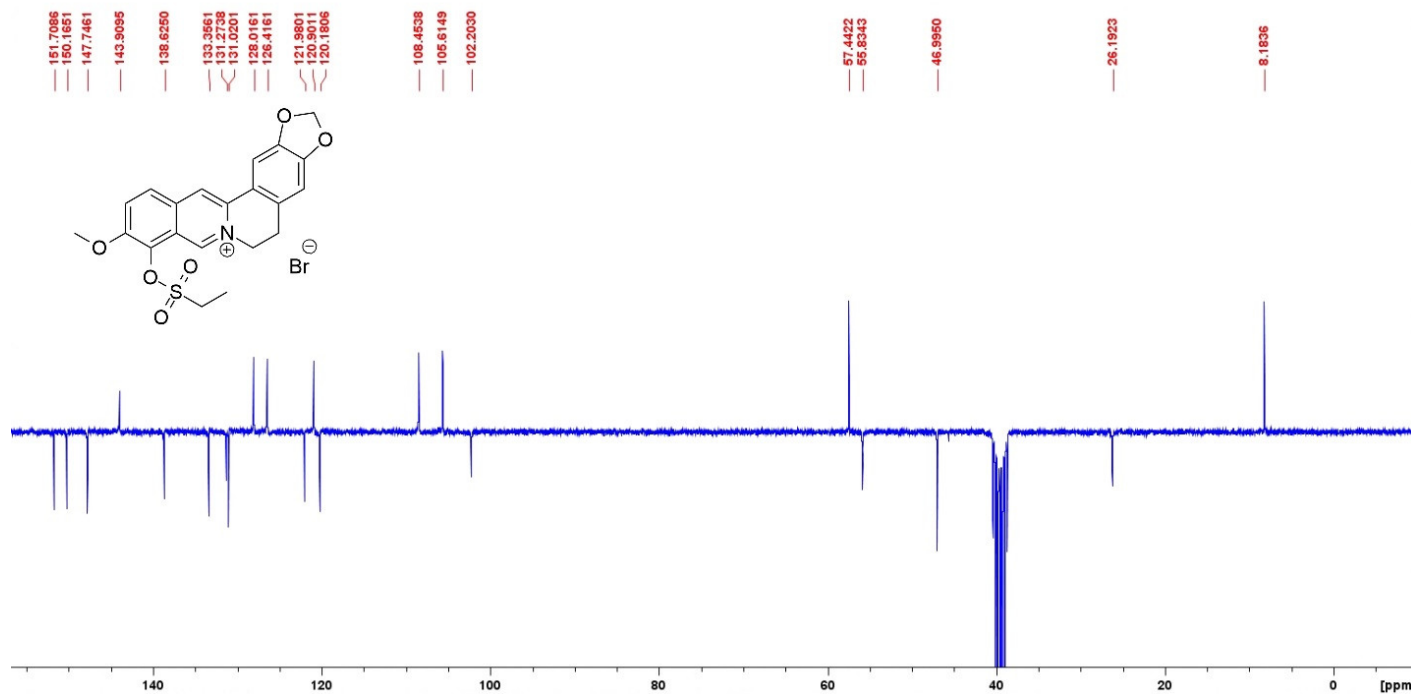

### Compound 10c (<sup>1</sup>H NMR)

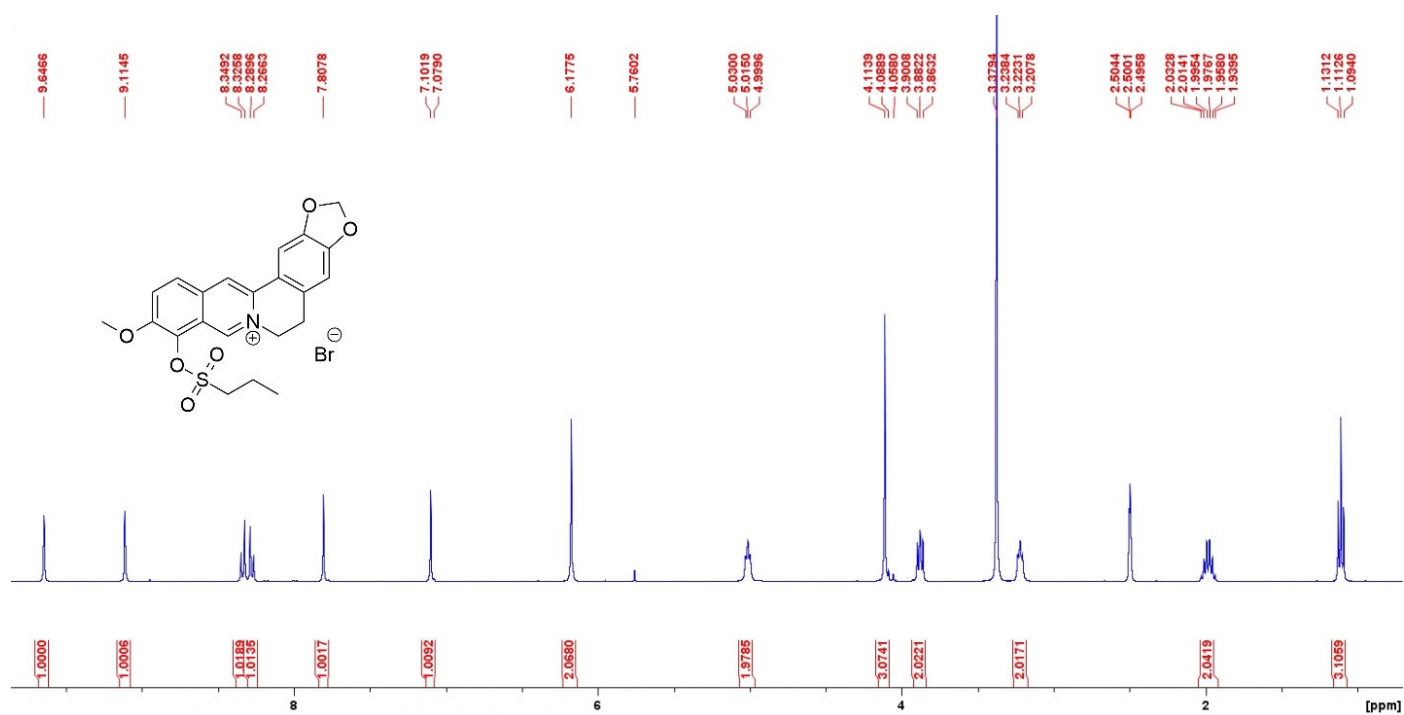

### Compound 10c (<sup>13</sup>C NMR)

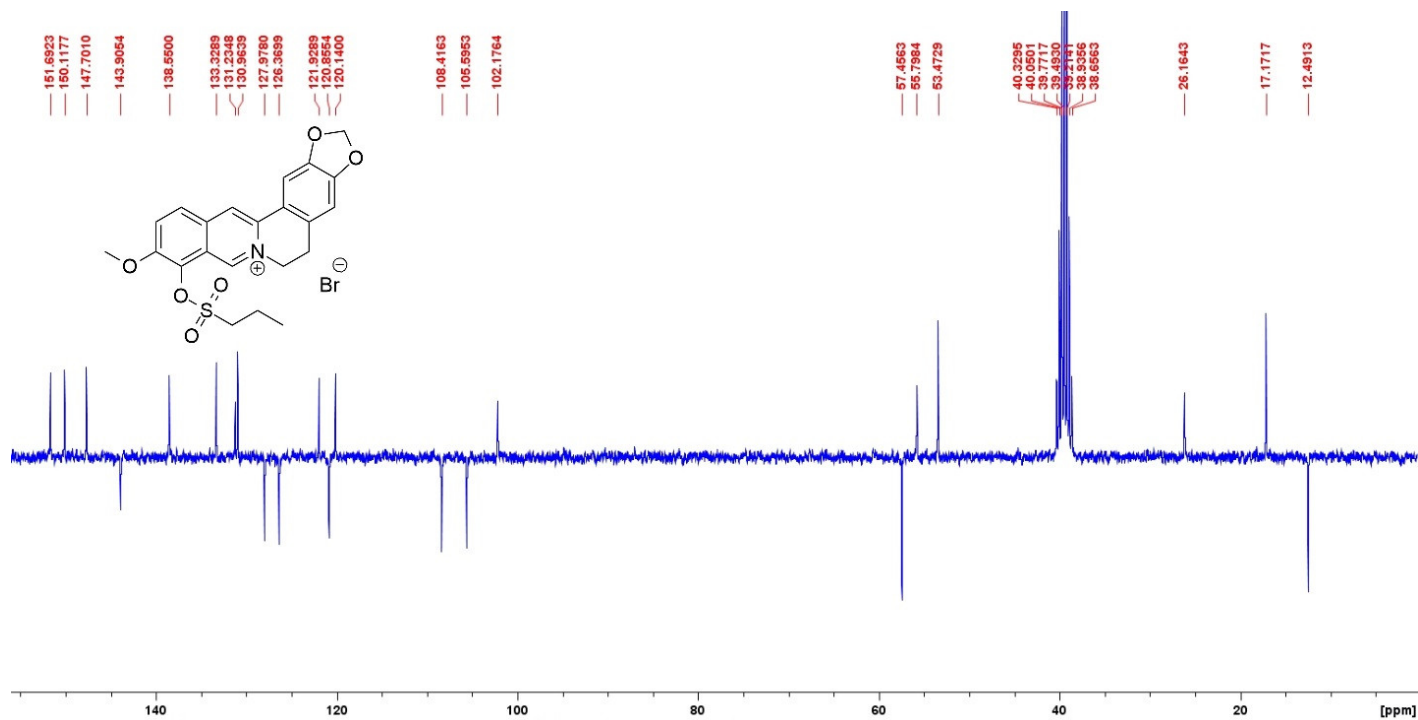

### Compound 10d (<sup>1</sup>H NMR)

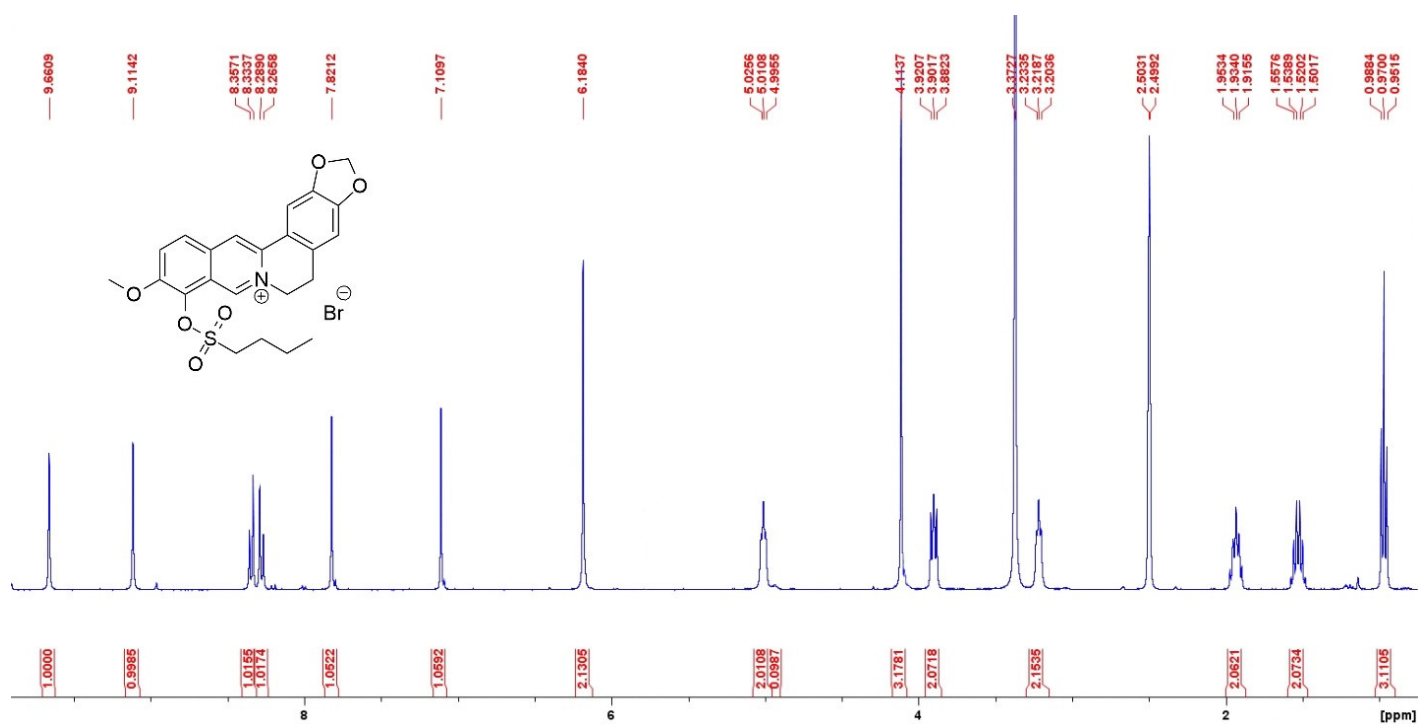

### Compound 10d (<sup>13</sup>C NMR)

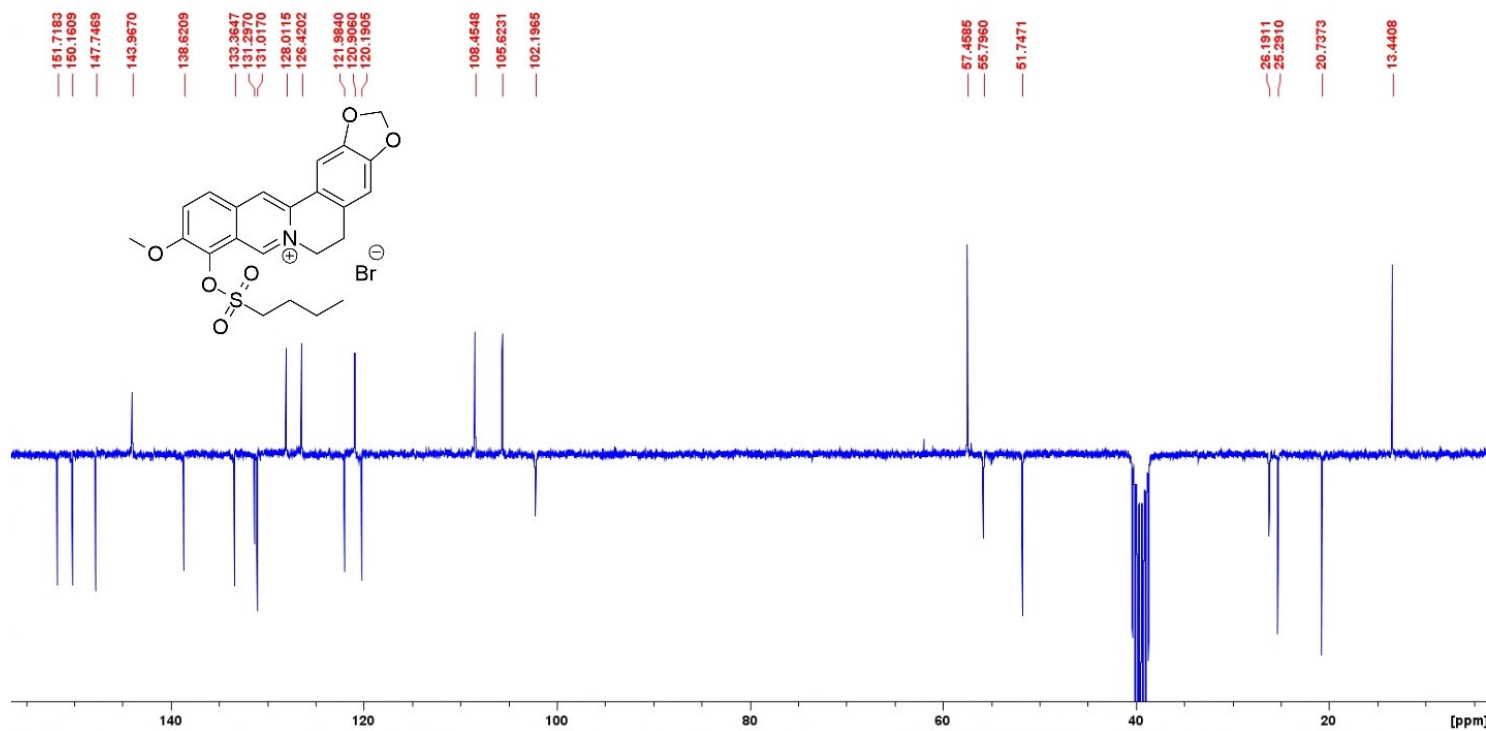

**Table S1.** The binding scores for the scoring functions used.

| Ligand     | ASP  | ChemScore | GoldScore | ChemPLP | IC <sub>50</sub> (μM) |
|------------|------|-----------|-----------|---------|-----------------------|
| <b>9</b>   | 31.0 | 23.4      | 48.8      | 55.9    | >15                   |
| <b>10a</b> | 33.4 | 27.6      | 59.6      | 62.0    | >15                   |
| <b>10b</b> | 34.9 | 28.1      | 60.9      | 63.3    | >15                   |
| <b>10c</b> | 33.8 | 27.9      | 66.2      | 62.8    | >15                   |
| <b>10d</b> | 34.4 | 29.0      | 59.6      | 72.6    | >15                   |
| <b>11a</b> | 34.3 | 26.5      | 52.0      | 55.0    | >15                   |
| <b>11b</b> | 31.4 | 27.9      | 58.8      | 59.6    | >15                   |
| <b>11c</b> | 32.6 | 24.9      | 55.4      | 59.7    | >15                   |
| <b>11d</b> | 33.1 | 27.0      | 57.4      | 63.9    | >15                   |
| <b>11e</b> | 38.1 | 31.6      | 67.9      | 63.1    | >15                   |
| <b>11f</b> | 39.2 | 24.1      | 58.8      | 65.7    | 0.98±0.20             |
| <b>11g</b> | 38.2 | 25.3      | 62.7      | 64.8    | 1.045±0.05            |
| <b>11h</b> | 42.5 | 26.5      | 67.4      | 70.2    | 0.93±0.22             |
| <b>12a</b> | 34.0 | 25.0      | 56.6      | 61.0    | >15                   |
| <b>12b</b> | 34.8 | 28.4      | 60.4      | 63.1    | >15                   |
| <b>12c</b> | 33.3 | 28.0      | 61.3      | 60.8    | 2.86±1.25             |
| <b>12d</b> | 34.6 | 27.1      | 58.2      | 59.8    | 4.06±1.05             |
| <b>12e</b> | 39.0 | 31.6      | 67.9      | 64.3    | >15                   |
| <b>12f</b> | 38.4 | 26.3      | 59.4      | 60.9    | 0.53±0.01             |
| <b>12g</b> | 38.3 | 27.4      | 59.0      | 62.3    | 1.33±0.28             |
| <b>12h</b> | 39.1 | 25.9      | 58.5      | 69.1    | 1.38±0.30             |

**Table S2.** The molecular descriptors and their corresponding Known Drug Indexes 2a and 2b (KDI2a/2b).

| Name                   | MW    | Log P | HA   | HD | PSA  | Rot.Bond. | KDI2a | KDI2b |
|------------------------|-------|-------|------|----|------|-----------|-------|-------|
| <b>9<sup>a</sup></b>   | 336.4 | 2.3   | 4    | 0  | x    | x         | x     | x     |
| <b>10a<sup>a</sup></b> | 400.4 | 1.6   | 6    | 0  | x    | x         | x     | x     |
| <b>10b<sup>a</sup></b> | 414.5 | 1.9   | 6    | 0  | x    | x         | x     | x     |
| <b>10c<sup>a</sup></b> | 428.5 | 2.4   | 6    | 0  | x    | x         | x     | x     |
| <b>10d<sup>a</sup></b> | 442.5 | 2.8   | 6    | 0  | x    | x         | x     | x     |
| <b>11a</b>             | 403.4 | 1.7   | 8.75 | 0  | 67.1 | 3         | 5.36  | 0.48  |
| <b>11b</b>             | 417.5 | 2.0   | 8.75 | 0  | 67.4 | 4         | 5.40  | 0.51  |

|            |       |     |      |   |      |   |      |      |
|------------|-------|-----|------|---|------|---|------|------|
| <b>11c</b> | 431.5 | 2.1 | 8.75 | 0 | 72.9 | 5 | 5.39 | 0.50 |
| <b>11d</b> | 445.5 | 2.8 | 8.75 | 0 | 71.8 | 6 | 5.34 | 0.47 |
| <b>11e</b> | 479.5 | 3.4 | 8.75 | 0 | 77.0 | 4 | 5.27 | 0.43 |
| <b>11f</b> | 555.5 | 4.2 | 8.75 | 0 | 71.1 | 4 | 4.91 | 0.26 |
| <b>11g</b> | 537.5 | 3.9 | 8.75 | 0 | 71.1 | 4 | 5.00 | 0.30 |
| <b>11h</b> | 605.5 | 4.9 | 8.75 | 0 | 69.1 | 4 | 4.62 | 0.15 |
| <b>12a</b> | 482.3 | 2.3 | 8.75 | 0 | 66.1 | 3 | 5.21 | 0.41 |
| <b>12b</b> | 496.4 | 2.5 | 8.75 | 0 | 73.4 | 4 | 5.22 | 0.41 |
| <b>12c</b> | 510.4 | 2.6 | 8.75 | 0 | 72.6 | 5 | 5.16 | 0.38 |
| <b>12d</b> | 524.4 | 3.3 | 8.75 | 0 | 71.4 | 6 | 5.06 | 0.33 |
| <b>12e</b> | 558.4 | 3.9 | 8.75 | 0 | 75.0 | 4 | 4.93 | 0.26 |
| <b>12f</b> | 634.4 | 4.6 | 8.75 | 0 | 71.6 | 4 | 4.58 | 0.12 |
| <b>12g</b> | 616.4 | 4.4 | 8.75 | 0 | 72.1 | 4 | 4.67 | 0.15 |
| <b>12h</b> | 684.4 | 5.4 | 8.75 | 0 | 70.9 | 4 | 4.35 | 0.06 |

<sup>a</sup> Values generated using Scigress, x – no values

**Table S3.** Definition of lead-like, drug-like and Known drug space (KDS) in terms of molecular descriptors. The values given are the maxima for each descriptor for the volumes of chemical space used.

|                                            | <b>Lead-like</b> |                        |                         |
|--------------------------------------------|------------------|------------------------|-------------------------|
|                                            | <b>Space</b>     | <b>Drug-like Space</b> | <b>Known Drug Space</b> |
| Molecular weight (g mol <sup>-1</sup> )    | 300              | 500                    | 800                     |
| Lipophilicity (Log P)                      | 3                | 5                      | 6.5                     |
| Hydrogen bond donors (HD)                  | 3                | 5                      | 7                       |
| Hydrogen bond acceptors (HA)               | 3                | 10                     | 15                      |
| Polar surface area (Å <sup>2</sup> ) (PSA) | 60               | 140                    | 180                     |
| Rotatable bonds (RB)                       | 3                | 10                     | 17                      |
